# Supplementary material for: Morphological insights in oxidative sensitive nanocarrier pharmacokinetics, targeting, and photodynamic therapy
Source: Royal Society of Chemistry journal article supplement (doi:10.1039/d4tb02194k), 2025-01-01
Supplement: d4tb02194k1.pdf [file d4tb02194k1.pdf]

1 Supporting materials for

2 **Morphological Insights in Oxidative Sensitive Nanocarriers Pharmacokinetics,**  
3 **Targeting, and Photodynamic Therapy**

4 Haitao Ding,<sup>a,†</sup> □ Liping Su,<sup>a,†</sup> □ Zhendong Xie,<sup>a,b,c,†</sup> □ Aroa Duro Castano,<sup>d</sup> Yunkun

5 Li,<sup>a</sup> Lorena Ruiz Perez,<sup>a,b,e</sup> Junyang Chen,<sup>a,b,d</sup> Kui Luo,<sup>a,f\*</sup> Xiaohe Tian,<sup>a\*</sup> Giuseppe

6 Battaglia,<sup>a,b,c,d,g\*</sup>

7 <sup>a</sup>Department of Radiology and National Clinical Research Center for Geriatrics, Huaxi MR Research  
8 Center (HMRRC), Frontiers Science Center for Disease-Related Molecular Network, State Key  
9 Laboratory of Biotherapy, West China Hospital of Sichuan University, Chengdu 610000, Sichuan  
10 Province, China. <sup>b</sup>Institute for Bioengineering of Catalunya (IBEC), The Barcelona Institute of Science  
11 and Technology (BIST), Barcelona (Spain), Carrer Baldori I Reixac, 08028, Barcelona, Spain.  
12 <sup>c</sup>Department of Electronic and Biomedical Engineering, University of Barcelona., Martí i Franquès 1,  
13 08028, Barcelona, Spain <sup>d</sup>Department of Chemistry, University College London, 20 Gordon Street,  
14 WC1H 0AJ, London, UK. <sup>e</sup>Department of Applied Physics, University of Barcelona, Martí i Franquès 1,  
15 08028, Barcelona, Spain. <sup>f</sup>Functional and molecular imaging Key Laboratory of Sichuan Province, and  
16 Research Unit of Psychoradiology, Chinese Academy of Medical Sciences, Chengdu, 610041, China.  
17 <sup>g</sup>Catalan Institution for Research and Advanced Studies (ICREA), Passeig de Lluís Companys, 23,  
18 08010, Barcelona, Spain.

19 \*Corresponding authors.

20 †□ These authors contributed equally.

21

## 22 Table of Contents

|    |                                                                                                            |    |
|----|------------------------------------------------------------------------------------------------------------|----|
| 23 | <b>1. Main Experimental methods</b> .....                                                                  | 4  |
| 24 | <b>1.1. Stability</b> .....                                                                                | 4  |
| 25 | <b>1.2 Cell culture</b> .....                                                                              | 4  |
| 26 | <b>1.3 Cytotoxicity assessment</b> .....                                                                   | 4  |
| 27 | <b>1.4 Endocytosis pathways</b> .....                                                                      | 4  |
| 28 | <b>1.5 Sub-organelle colocalization experiment</b> .....                                                   | 5  |
| 29 | <b>1.6 Physiological based pharmacokinetics (PBPK) model's parameter fitting and</b>                       |    |
| 30 | <b>ranking</b> .....                                                                                       | 5  |
| 31 | <b>2. Supporting Figures</b> .....                                                                         | 6  |
| 32 | <b>Fig. S1 (A-C) The average size of Ce6@PEG5k-PMET<sub>5/40/120</sub> with time in water, PBS and 10%</b> |    |
| 33 | <b>FBS. ....</b>                                                                                           | 6  |
| 34 | <b>Fig. S2 Absorption spectra of PEG5k-PMET<sub>5/40/120</sub>.....</b>                                    | 6  |
| 35 | <b>Fig. S3 Fluorescence spectra of PEG5k-PMET<sub>5/40/120</sub>.....</b>                                  | 6  |
| 36 | <b>Fig. S4 <i>In vitro</i> cytotoxicity of PEG5k-PMET<sub>5/40/120</sub> in QSG and HepG2 cells.....</b>   | 7  |
| 37 | <b>Fig. S5 <i>In vitro</i> cytotoxicity of Ce6@NPs in HepG2 cells without laser irradiation.....</b>       | 7  |
| 38 | <b>Fig. S6 (A) Fluorescence images of HepG2 cells stained with DCFH-DA and SOSG after</b>                  |    |
| 39 | <b>treatment with Ce6@NPs for 24 hours. Quantification of the fluorescence intensity of</b>                |    |
| 40 | <b>DCFH-DA (B) and SOSG (C) in HepG2 cells treated with Ce6@NPs for 24 hours. ....</b>                     | 7  |
| 41 | <b>Fig.S7 Histogram results of Pearson coefficients of micelles, worms, and vesicles with</b>              |    |
| 42 | <b>Golgi (Golgi bodies), ER (endoplasmic reticulum), Lyso (lysosomes), and Mito</b>                        |    |
| 43 | <b>(mitochondria) in HepG2 cells. ....</b>                                                                 | 8  |
| 44 | <b>Fig.S8 The colocalization of micelle and organelles. Scale bar = 50 μm. (A) Golgi</b>                   |    |
| 45 | <b>apparatus; (B) Endoplasmic reticulum; (C) Lysosomes; (D) Mitochondria. ....</b>                         | 8  |
| 46 | <b>Fig.S9 The colocalization of worm and organelles. Scale bar = 50 μm. (A) Golgi apparatus;</b>           |    |
| 47 | <b>(B) Endoplasmic reticulum; (C) Lysosomes; (D) Mitochondria. ....</b>                                    | 9  |
| 48 | <b>Fig.S10 The colocalization of vesicle and organelles. Scale bar = 50 μm. (A) Golgi</b>                  |    |
| 49 | <b>apparatus; (B) Endoplasmic reticulum; (C) Lysosomes; (D) Mitochondria. ....</b>                         | 9  |
| 50 | <b>Fig.S11 Flow cytometry detection of Effects of different endocytic inhibitors and</b>                   |    |
| 51 | <b>temperature (4 °C) on the cellular uptake of micelle(A), worm(B), and vesicle(C).....</b>               | 10 |
| 52 | <b>Fig.S12 <i>In vivo</i> fluorescent images of nude mice bearing HepG2 tumors treated with</b>            |    |
| 53 | <b>NPs@Ce6 (the concentration of Ce6 at 0.5 mg/mL) at different time-points. ....</b>                      | 10 |
| 54 | <b>Fig.S13 <i>Ex vivo</i> fluorescent images for harvested tumors and major organs at the 3 hours.</b>     |    |
| 55 | <b>.....</b>                                                                                               | 11 |
| 56 | <b>Fig.S14 <i>Ex vivo</i> fluorescent images for harvested tumors and major organs at the 6 hours.</b>     |    |

|    |                                                                                                  |           |
|----|--------------------------------------------------------------------------------------------------|-----------|
| 57 | .....                                                                                            | 11        |
| 58 | <b>Fig.S15 <i>Ex vivo</i> fluorescent images for harvested tumors and major organs at the 24</b> |           |
| 59 | <b>hours. ....</b>                                                                               | <b>12</b> |
| 60 | <b>Fig.S16 <i>Ex vivo</i> fluorescent images for harvested tumors and major organs at the 48</b> |           |
| 61 | <b>hours. ....</b>                                                                               | <b>12</b> |
| 62 | <b>Fig. S17. Parameter rank based on global sensitivity in the PBPK model. The parameter</b>     |           |
| 63 | <b>with the highest sensitivity in the model is ranked 10, while the one with the lowest</b>     |           |
| 64 | <b>sensitivity is ranked 0.....</b>                                                              | <b>13</b> |
| 65 | <b>Fig.S18 H&amp;E staining of the heart, liver, spleen, lung, and kidney after various</b>      |           |
| 66 | <b>treatments. ....</b>                                                                          | <b>13</b> |
| 67 | <b>3. Supporting Tables.....</b>                                                                 | <b>14</b> |
| 68 | <b>Table S1. Pharmacokinetic parameters for mice treated with NPs@Ce6 and free Ce6 by</b>        |           |
| 69 | <b>fitting the data to a non-compartment model by PKSolver 2.0 software. ....</b>                | <b>14</b> |
| 70 |                                                                                                  |           |
| 71 |                                                                                                  |           |

## 72 **1. Main Experimental methods**

### 73 **1.1. Stability**

74 To study the stability of Ce6@NPs, we incubated them in water, PBS and cell culture medium.  
75 Alteration of size and zeta potential were detected *via* DLS (Omni, Brookhaven Instrument, USA).  
76 Briefly, Ce6@NPs were incubated in above three conditions for 2 hours, 6 hours, 24 hours, 48 hours  
77 and 72 hours. At each time point, samples were measured *via* DLS.

### 78 **1.2 Cell culture**

79 HepG2 (human liver carcinoma cell line) and QSG (human hepatic cell line) were obtained from the  
80 Cell Bank of the Chinese Academy of Sciences (Shanghai, China). And they were cultured in the cell  
81 incubator under a humidified atmosphere at 37 °C (5% CO<sub>2</sub>, 95% air). The DMEM medium was used to  
82 culture QSG and HepG2 cells (containing 1% (v/v) penicillin-streptomycin, and 10% (v/v) fetal bovine  
83 serum). The cells out of the liquid nitrogen tank were passaged at least twice for experimental use.

### 84 **1.3 Cytotoxicity assessment**

85 HepG2 and QSG cells were seeded in 96-well plates and cultured in a normal oxygen incubator (5%  
86 CO<sub>2</sub>, 37 °C). After 24 hours, PEG5k-PMET<sub>5/40/120</sub> at an equivalent concentration of 0–200 µg/mL was  
87 added in each well (n = 5 for each group). After 24 hours of incubation with contrast agents, the CCK-8  
88 (Med Chem Express, USA) assay was performed to measure the cytotoxicity of experimental and control  
89 groups.

### 90 **1.4 Endocytosis pathways**

91 To clarify the endocytic pathway of NPs, HepG2 cells were seeded into 12-well plates. Next, cells and  
92 inhibitors (10 µg/mL chlorpromazine, 10 µM 2-deoxy-d-glucose, 10 µM colchicine, and 50 mM NH<sub>4</sub>Cl)  
93 were incubated for 30 minutes at 37 °C. After removing the above inhibitors, Ce6@NPs at a Ce6  
94 concentration of 1 µg/mL were added to the pre-incubated cells and incubated for an additional 3  
95 hours. Another group of cells was pre-incubated for 30 minutes at 4 °C, followed by the addition of  
96 Ce6@NPs for an additional 3 hours. Cells cultured at room temperature without any treatment were  
97 used as controls. After completing the above treatment steps, the cells were collected, washed twice  
98 with PBS, and the fluorescence intensity inside the cells was detected by flow cytometry.

### 99 **1.5 Sub-organelle colocalization experiment**

100 HepG2 cells were inoculated on a glass substrate and incubated for 1 day. Micelle, worm and vesicle

101 were incubated with the cells. The concentration was determined based on the Ce6 (10 µg/mL) content.  
102 After incubation for 3 hours, organelle staining reagents were added, including ER-Tracker Green  
103 (Beyotime, C1042S), Lyso-Tracker Green (Beyotime, C1047S), Mito-Tracker Green (Beyotime, C1048),  
104 and Golgi-Tracker Green (Beyotime, C1045S). After staining, the cells were washed twice, followed  
105 by Hoechst 33342 staining (Yeasen, China) for 10 minutes, and then washed twice with PBS. Confocal  
106 microscopy (CLSM, Nikon, Japan) was used to acquire images.

#### 107 **1.6 Physiological based pharmacokinetics (PBPK) model's parameter fitting and ranking**

108 The PBPK model includes numerous parameters. To explore the parameter space and fit the parameter,  
109 we utilized particle swarm optimization (PSO) implemented via the Python package PySwarms, genetic  
110 algorithm (GA) via the Python package DEAP, and simulated annealing (SA) via the Python package  
111 SciPy. After we find out the parameter for different particle type, we analysed the parameter  
112 sensitivity. Sensitivity analysis can be divided into two categories: local sensitivity analysis and  
113 global sensitivity analysis<sup>1</sup>. The sensitivity can be calculated as follows:

$$114 \quad SC = \frac{(AUC_{0-\infty}' - AUC_{0-\infty})/AUC_{0-\infty}}{(Par' - Par)/Par}$$

115 where  $SC$  is the sensitivity;  $AUC_{0-\infty}$  and  $AUC_{0-\infty}'$  is the area under curve before and under perturbed,  
116 respectively; and  $Par'$  and  $Par$  is the perturbed value and reference value of the parameter under  
117 investigation.

118

119 **2. Supporting Figures**

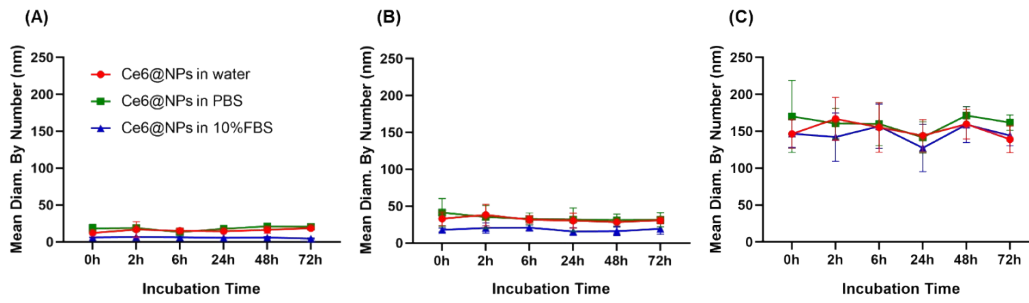

120

121 **Fig. S1 (A-C) The average size of Ce6@PEG5k-PMET<sub>5/40/120</sub> with time in water, PBS and 10% FBS.**

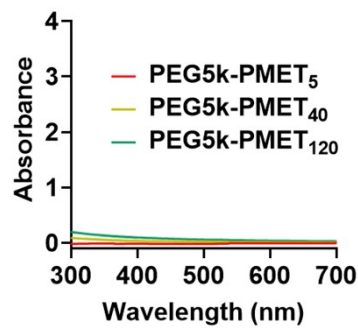

122

123 **Fig. S2 Absorption spectra of PEG5k-PMET<sub>5/40/120</sub>.**

124

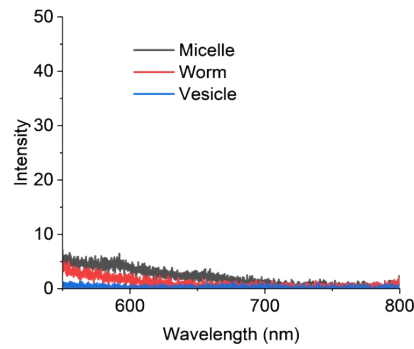

125

126 **Fig. S3 Fluorescence spectra of PEG5k-PMET<sub>5/40/120</sub>.**

127

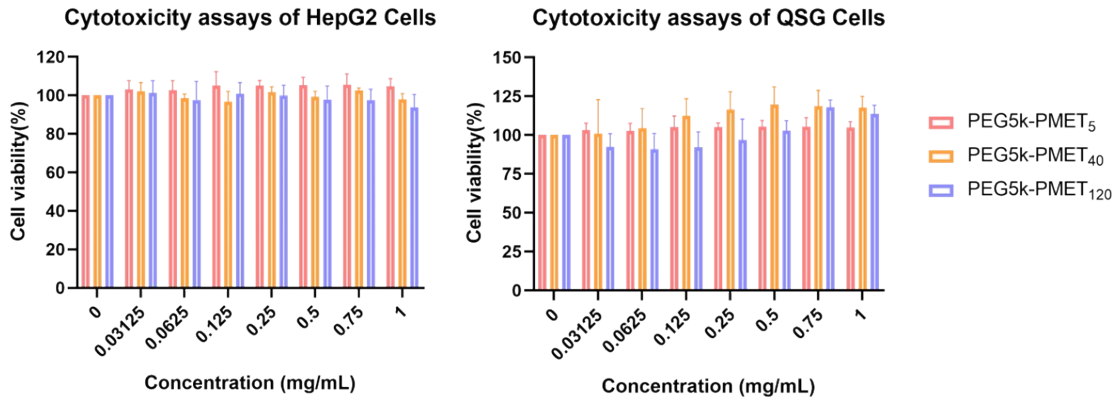

128

129 Fig. S4 *In vitro* cytotoxicity of PEG5k-PMET<sub>5/40/120</sub> in QSG and HepG2 cells.

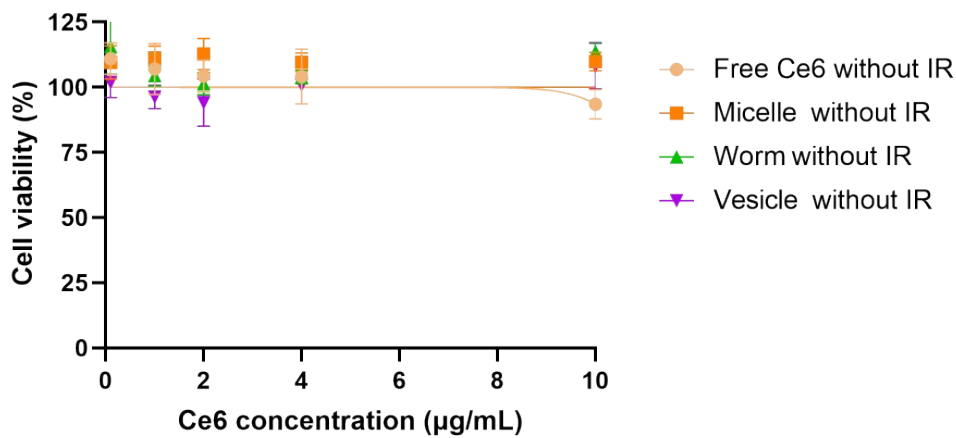

130

131 Fig. S5 *In vitro* cytotoxicity of Ce6@NPs in HepG2 cells without laser irradiation.

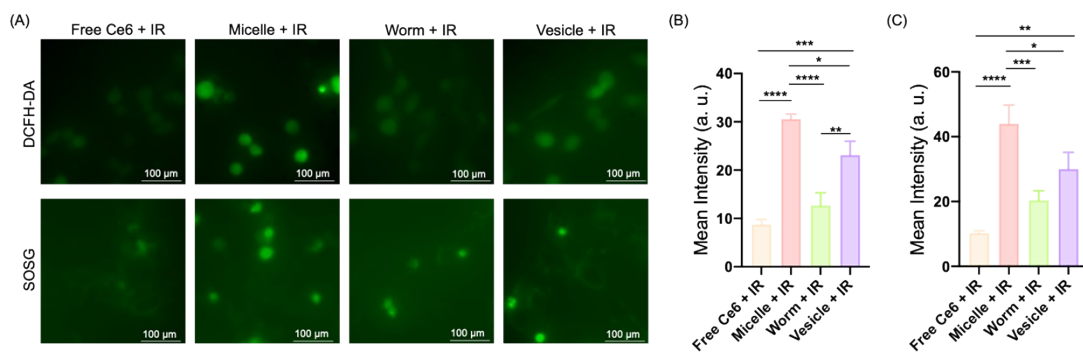

132

133 Fig. S6 (A) Fluorescence images of HepG2 cells stained with DCFH-DA and SOSG after treatment with

134 Ce6@NPs for 24 hours. Quantification of the fluorescence intensity of DCFH-DA (B) and SOSG (C) in

135 HepG2 cells treated with Ce6@NPs for 24 hours.

136

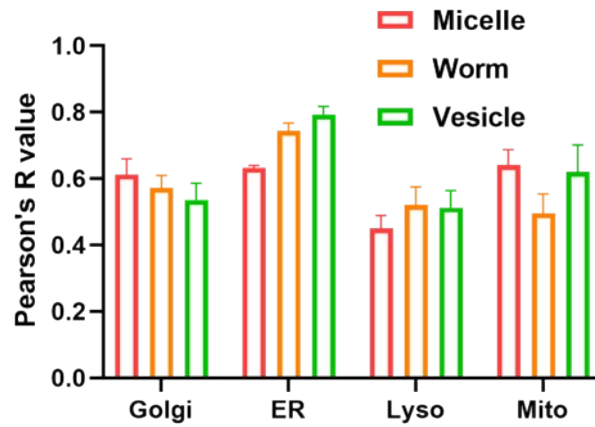

137

138 Fig.S7 Histogram results of Pearson coefficients of micelles, worms, and vesicles with Golgi (Golgi  
 139 bodies), ER (endoplasmic reticulum), Lyso (lysosomes), and Mito (mitochondria) in HepG2 cells.

140

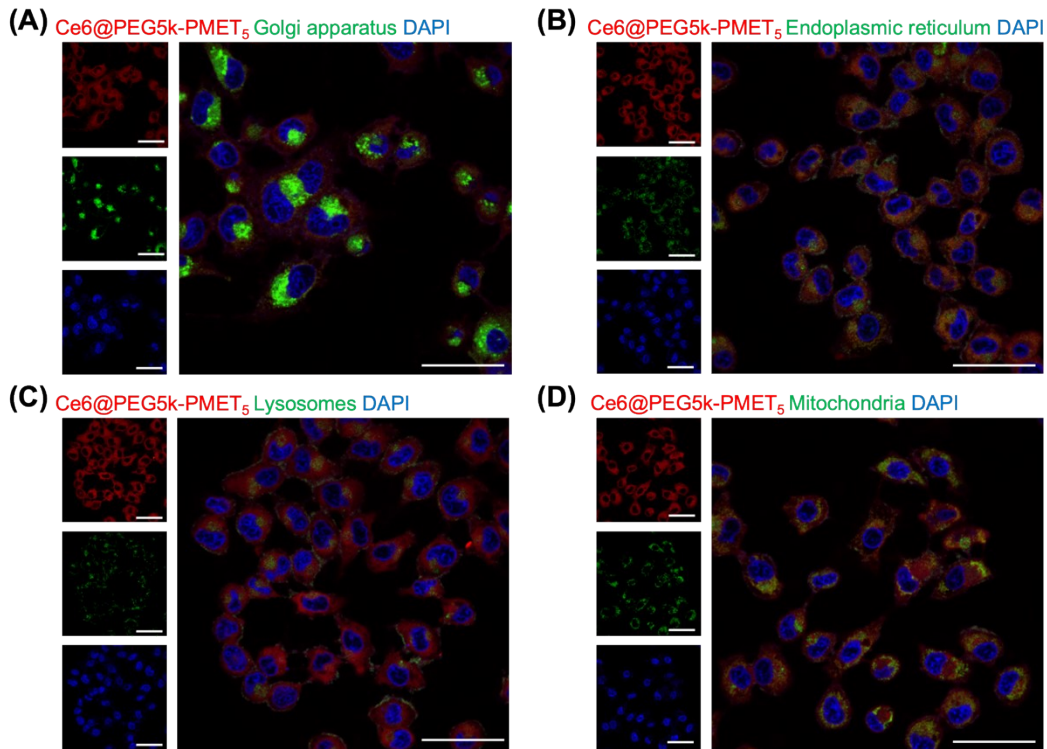

141

142 Fig.S8 The colocalization of micelle and organelles. Scale bar = 50  $\mu$ m. (A) Golgi apparatus; (B)  
 143 Endoplasmic reticulum; (C) Lysosomes; (D) Mitochondria.

144



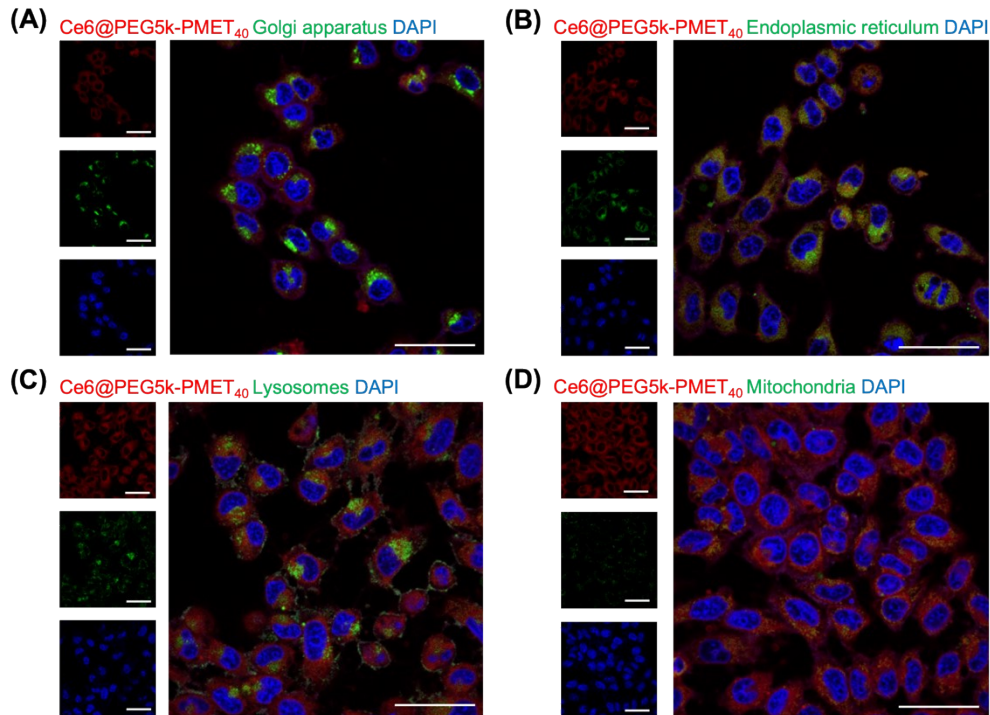

145

146 Fig.S9 The colocalization of worm and organelles. Scale bar = 50  $\mu\text{m}$ . (A) Golgi apparatus; (B)

147 Endoplasmic reticulum; (C) Lysosomes; (D) Mitochondria.

148

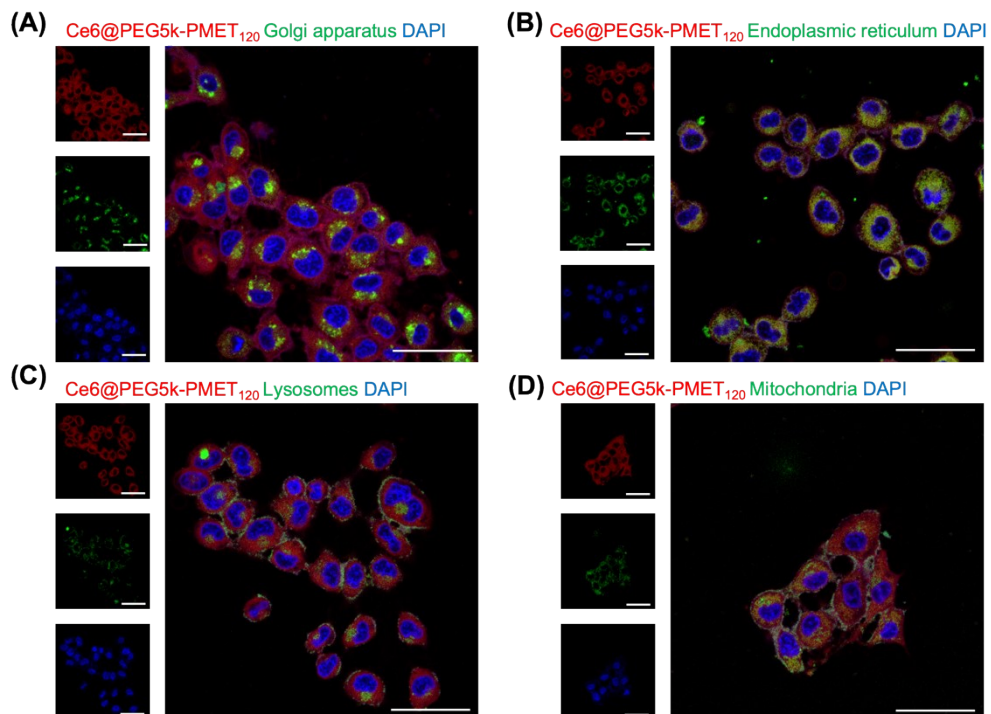

149

150 Fig.S10 The colocalization of vesicle and organelles. Scale bar = 50  $\mu\text{m}$ . (A) Golgi apparatus; (B)

151 Endoplasmic reticulum; (C) Lysosomes; (D) Mitochondria.

152

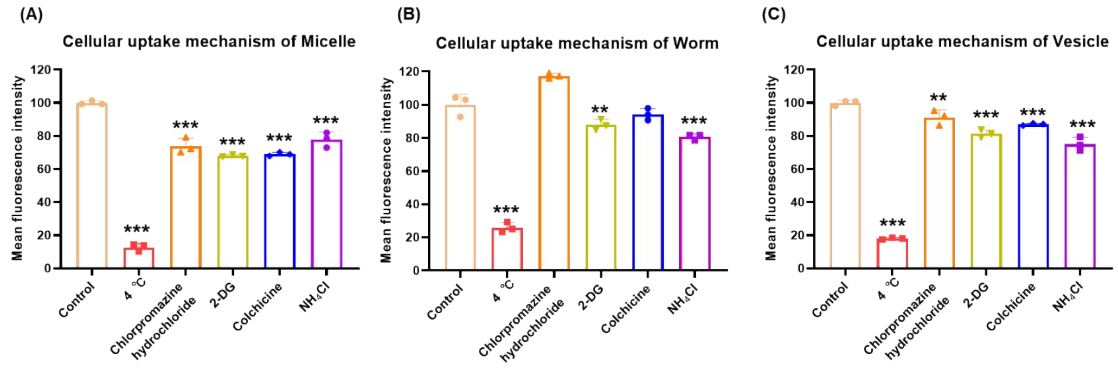

153

154 Fig.S11 Flow cytometry detection of Effects of different endocytic inhibitors and temperature (4 °C)

155 on the cellular uptake of micelle(A), worm(B), and vesicle(C).

156

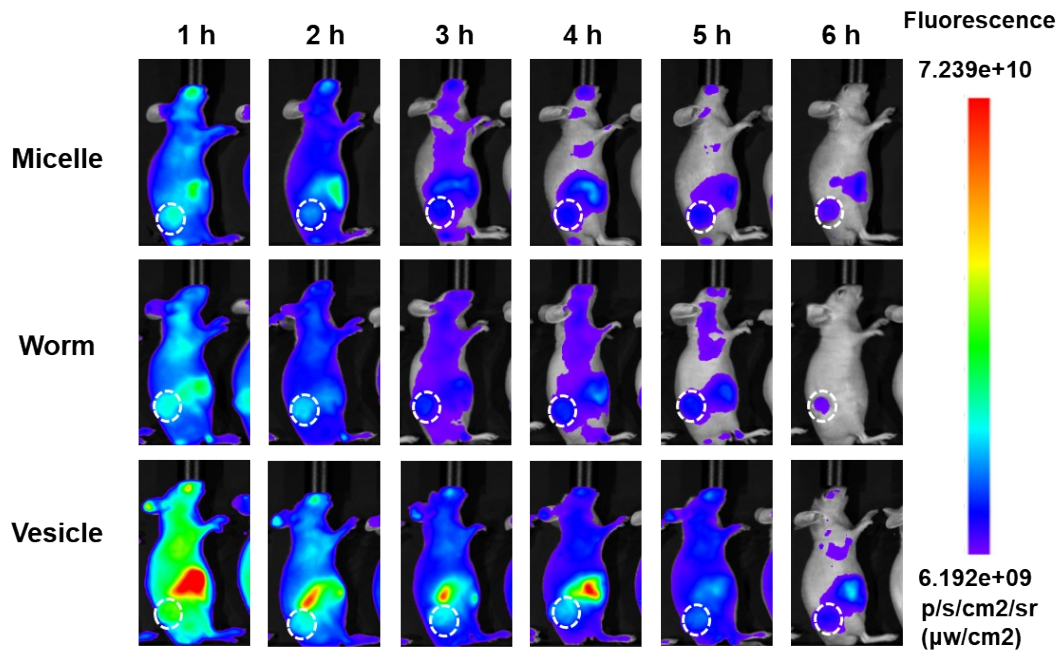

157

158 Fig.S12 *In vivo* fluorescent images of nude mice bearing HepG2 tumors treated with NPs@Ce6 (the

159 concentration of Ce6 at 0.5 mg/mL) at different time-points.

160

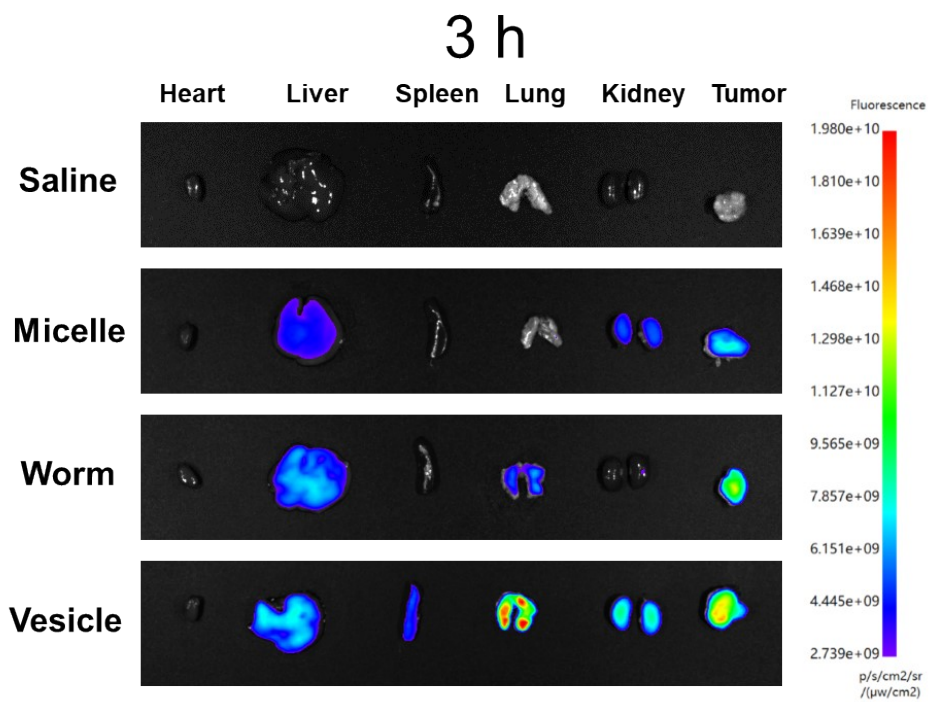

161

162 **Fig.S13** *Ex vivo* fluorescent images for harvested tumors and major organs at the 3 hours.

163

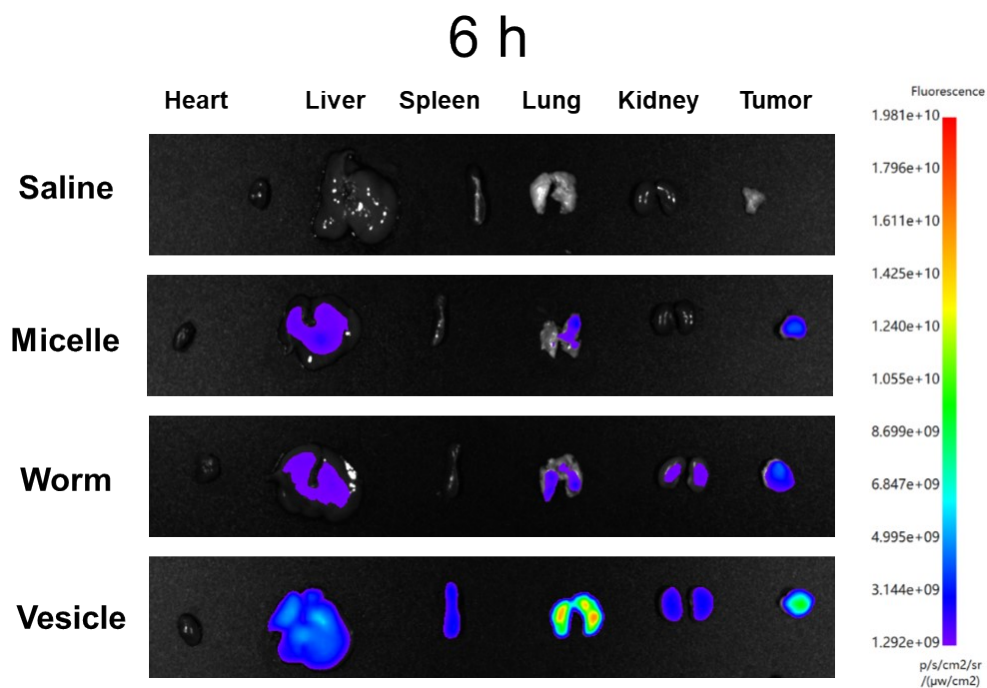

164

165 **Fig.S14** *Ex vivo* fluorescent images for harvested tumors and major organs at the 6 hours.

166

24 h

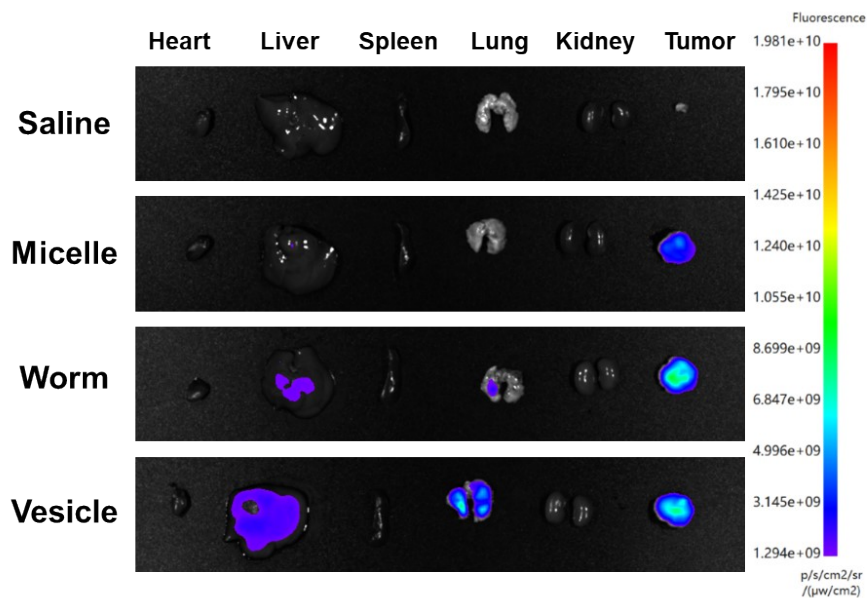

167

168 Fig.S15 *Ex vivo* fluorescent images for harvested tumors and major organs at the 24 hours.

169

48 h

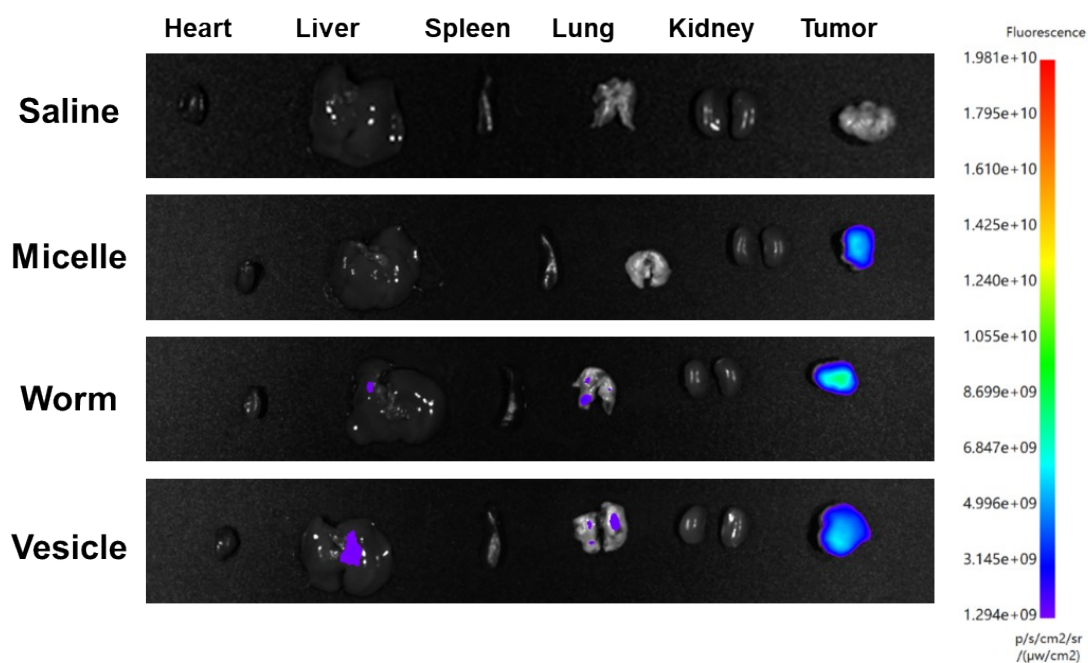

170

171 Fig.S16 *Ex vivo* fluorescent images for harvested tumors and major organs at the 48 hours.

172

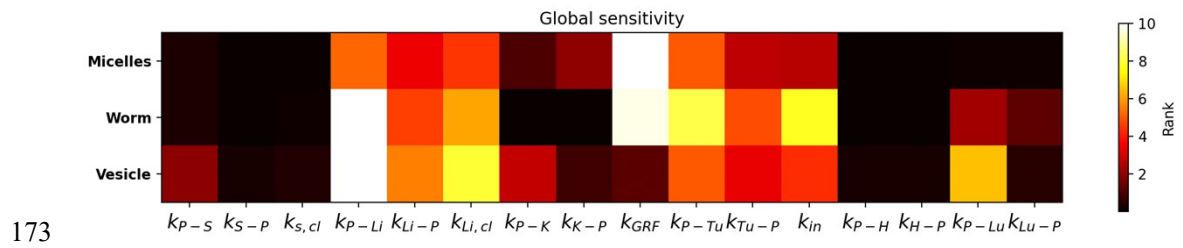

174 Fig. S17. Parameter rank based on global sensitivity in the PBPK model. The parameter with the  
 175 highest sensitivity in the model is ranked 10, while the one with the lowest sensitivity is ranked 0.

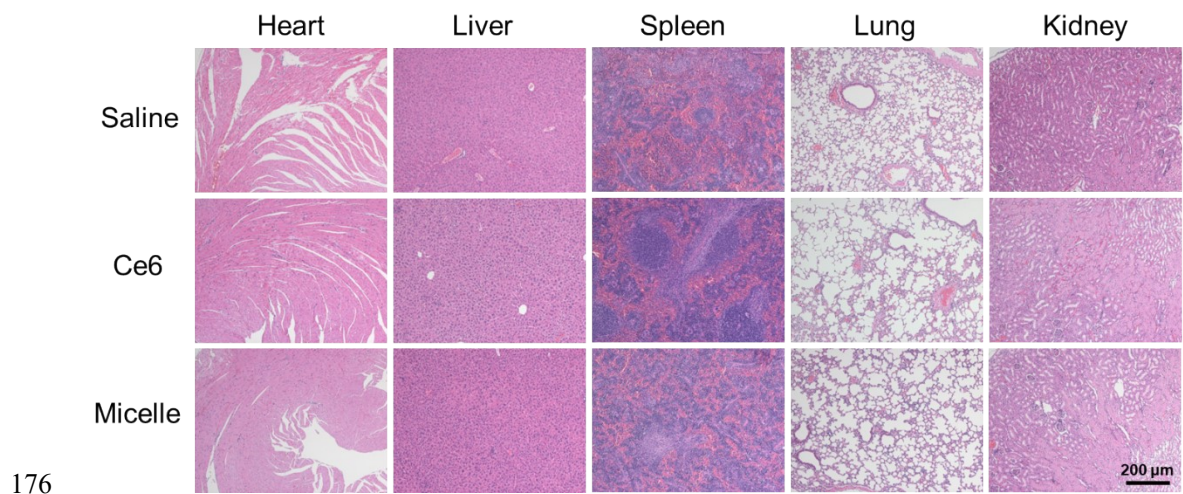

177 Fig.S18 H&E staining of the heart, liver, spleen, lung, and kidney after various treatments.

178 **3. Supporting Tables**

179 **Table S1. Pharmacokinetic parameters for mice treated with NPs@Ce6 and free Ce6 by fitting the**  
180 **data to a non-compartment model by PKSolver 2.0 software.**

| Parameter | T <sub>1/2</sub> (min) | AUC <sub>0-∞</sub> (µg/mL·min) | CL (L/min/kg) | MRT <sub>0-∞</sub> (min) |
|-----------|------------------------|--------------------------------|---------------|--------------------------|
| Micelle   | 313                    | 794                            | 0.126         | 378                      |
| Worm      | 563                    | 898                            | 0.111         | 518                      |
| Vesicle   | 428                    | 729                            | 0.137         | 459                      |

181

182

183 1. P. Dogra, J. D. Butner, J. Ruiz Ramirez, Y. L. Chuang, A. Noureddine, C. Jeffrey Brinker, V.  
184 Cristini and Z. Wang, *Comput Struct Biotechnol J*, 2020, **18**, 518-531.

185
